# Supplementary material for: Helium conservation by discontinuous introduction in the flowing atmospheric-pressure afterglow source for ambient desorption-ionization mass spectrometry
Source: Royal Society of Chemistry journal article supplement (doi:10.1039/c5ja00228a), 2015-01-01
Supplement: c5ja00228a2.pdf [file c5ja00228a2.pdf]

Supplemental Information for Publication

Helium Conservation by Discontinuous Introduction in the Flowing Atmospheric-  
Pressure Afterglow Source for Ambient Desorption-Ionization Mass Spectrometry

Andrew P. Storey<sup>a</sup>, Offer M. Zeiri<sup>a,b</sup>, Steven J. Ray<sup>\*a</sup>, Gary M. Hieftje<sup>a</sup>

<sup>a</sup> Department of Chemistry, Indiana University, Bloomington, IN 47405

<sup>b</sup> Permanent address: Nuclear Research Center Negev, Beer-Sheva, Israel

\*Corresponding author: sray@indiana.edu

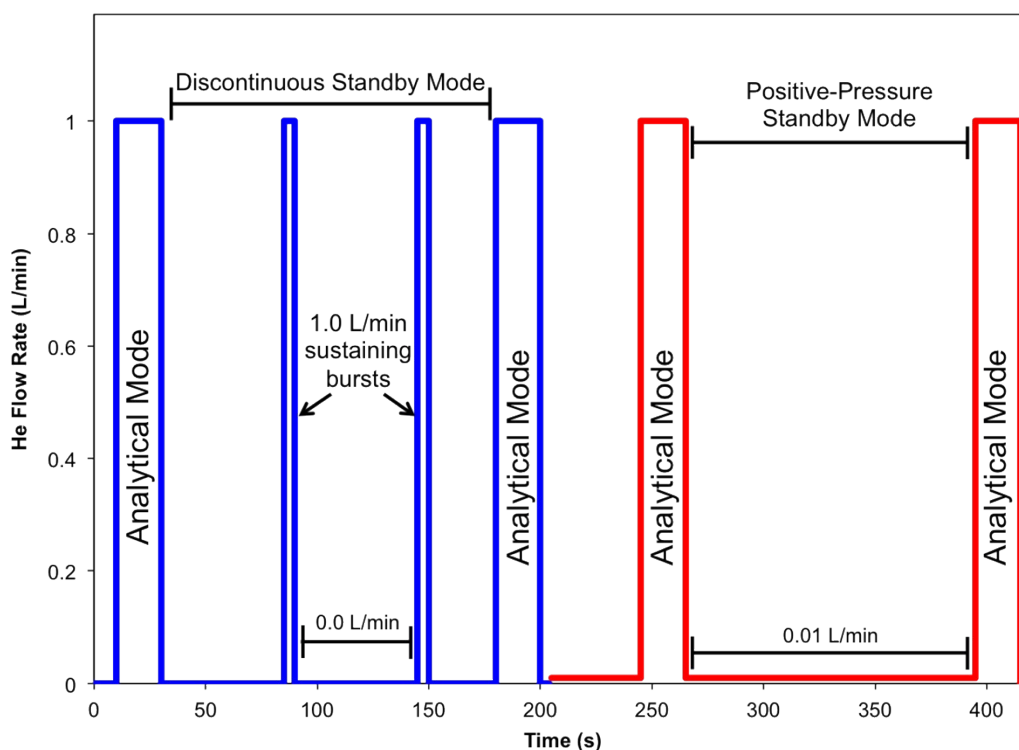

**Figure S1:** Operation of discontinuous standby mode, positive pressure standby mode and analytical modes of operation for helium conservation with the flowing atmospheric-pressure afterglow source in terms of time and helium flow rate.

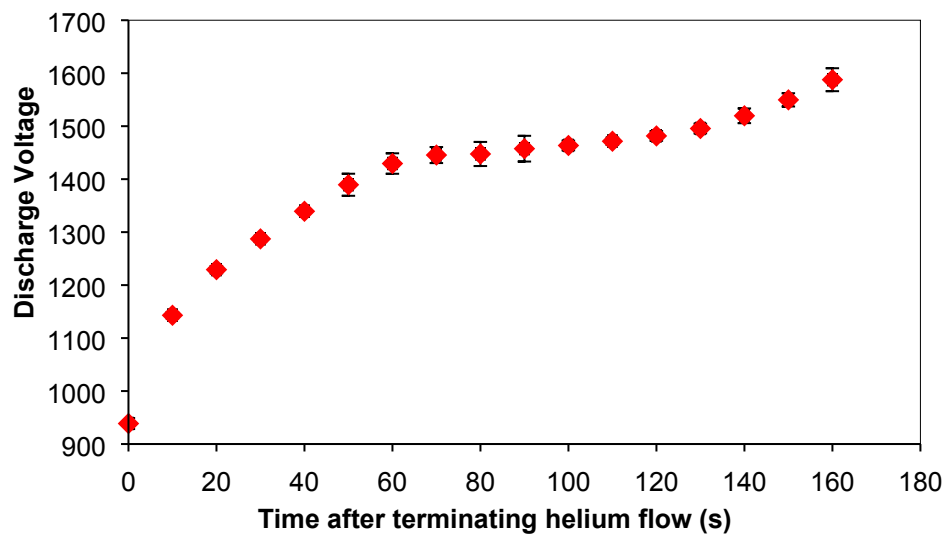

**Figure S2:** Change in voltage after helium flow it turned off. Error bars indicate the standard deviation of three trials. These data were obtained with a constant current of 30 mA and an initial helium flow of 1 L/min.
